# Supplementary material
Source: MDPI journal article supplement (https://www.mdpi.com/2311-5637/10/5/228)
Supplement: s1 [file s1]

Table S1. Tentative identification of compounds with odor-active aroma descriptors in cocoa-beverages replaced with chocolate made from natural jackfruit seed flour.

| Number | ID  | Description                                 | LRI_calc     | LRI_lit  | Compound name (Tentative_identification LRI) | Compound name (Tentative_identification NIST08.LIB) | Similarity (%) |
|--------|-----|---------------------------------------------|--------------|----------|----------------------------------------------|-----------------------------------------------------|----------------|
| 1      | Z1  | Fresh                                       | out of Range | nf       |                                              |                                                     |                |
| 2      | Z3  | Moist                                       | out of Range | nf       |                                              |                                                     |                |
| 3      | Z2  | Fresh                                       | out of Range | 611 /613 | Acetic acid / Ethyl acetate                  | Acetic acid, methyl ester                           | 93             |
| 4      | B3  | Earth / Chocolate                           | out of Range | 628      | 3-Methylbutanal (isovaleraldehyde)           | 3-Methylbutanal (isovaleraldehyde)                  | 95             |
| 5      | A4  | Malty cocoa                                 | 650          | 642      | 2 or 3-Methyl butanal                        | 2 or 3-Methyl butanal                               | 95             |
| 6      | Z4  | Fetid / Acid / Cheese                       | 757          | nf       |                                              |                                                     |                |
| 7      | Z5  | Citric                                      | 763          | nf       |                                              |                                                     |                |
| 8      | B4  | Cream/ Butter/ Fruit                        | 800          | 795      | 2,3 - Butanediol                             | 2,3-Butanediol                                      | 96             |
| 9      | Z6  | Fesh / Green / Mushroom                     | 804          | nf       |                                              |                                                     |                |
| 10     | Z7  | Moist / Earth                               | 807          | 804      | 3(2H)-Furanone, dihydro-2-methyl             | 3(2H)-Furanone, dihydro-2-methyl                    | 93             |
| 11     | Z8  | Chocolate / Sweet                           | 808          | nf       |                                              |                                                     |                |
| 12     | Z9  | Chocolate                                   | 823          | 819      | Methyl pyrazine                              | Pyrazine, methyl                                    | 89             |
| 13     | Z10 | Sweet / Peanuts / Butter                    | 828          | nf       |                                              |                                                     |                |
| 14     | Z11 | Fresh / Acid / Floral                       | 833          | nf       |                                              |                                                     |                |
| 15     | Z12 | Sweet/ Strawberry / Fresh / Floral / Honey  | 861          | 856      | (2-furyl)-methanol, 2-furanmethanol)         | 2-Furanmethanol                                     | 93             |
| 16     | Z13 | Woody / Mushroom / Mold                     | 885          | 890      | 2-Heptanone                                  | 2-Heptanone                                         | 89             |
| 17     | A6  | Green                                       | 905          | 903      | Heptanal                                     |                                                     |                |
| 18     | A7  | Orange/ Green / Acid                        | 906          | nf       |                                              | 3-Heptanol, 2,4-dimethyl-                           | 82             |
| 19     | Z14 | Burnt/ Cocoa/ Coffee                        | 907          | 908      | Pyrazine, 2,5-dimethyl                       | Pyrazine, 2,6-dimethyl                              | 85             |
| 20     | B7  | Aldeide/ Burnt /Sulfur                      | 912          | 911      | 2-methyl-1-pentanol                          | 3-Ethyl-2-pentanol                                  | 86             |
| 21     | Z15 | Fresh / Mint                                | 914          | nf       |                                              |                                                     |                |
| 22     | A8  | Cocoa, hazelnut, peanut butter, and roasted | 929          | 930      | 2,3-dimethylpyrazine                         |                                                     |                |
| 23     | Z16 | Acid                                        | 932          | nf       |                                              |                                                     |                |
| 24     | Z17 | Fruity / Citric / Lemon                     | 942          | nf       |                                              |                                                     |                |
| 25     | Z18 | Chocolate/ Pyrazine/ Mushroom / Butter      | 970          | 961      | Benzaldehyde                                 | Benzaldehyde                                        | 94             |
| 26     | Z19 | Green                                       | 977          | nf       |                                              |                                                     |                |
| 27     | Z20 | Fresh / Orange / Green                      | 995          | 1005     | Nonanal                                      | 2-Octen-1-ol, (E)-                                  | 84             |
| 28     | A11 | Peanuts                                     | 998          | 997      | Trimethylpyrazine                            | Pyrazine, trimethyl                                 | 90             |
| 29     | A10 | Floral / Fruity                             | 1008         | 998      | 2-Ethyl-6-methylpyrazine                     |                                                     |                |
| 30     | B10 | Mushuroom /Soup                             | 1015         | nf       | Hexanoic acid, ethyl ester                   |                                                     |                |
| 31     | C10 | Roast                                       | 1018         | nf       |                                              |                                                     |                |
| 32     | Z21 | Pyrazine / Earthy                           | 1037         | 1035     | Ethyl-methylpyrazine                         | Pyrazine, 3-ethyl-2,5-dimethyl-                     | 93             |
| 33     | A10 | Rose                                        | 1047         | 1045     | Phenylacetaldehyde                           |                                                     |                |
| 34     | Z22 | Woody / Cedro                               | 1047         | nf       |                                              |                                                     |                |
| 35     | B11 | Fresh / Mint / Green                        | 1053         | 1032     | Eucalyptol                                   |                                                     |                |
| 36     | Z23 | Sweet / Caramel                             | 1062         | nf       |                                              |                                                     |                |
| 37     | Z24 | Chocolate/Sweet                             | 1069         | 1069     | 3-Methylbenzaldehyde                         |                                                     |                |
| 38     | Z25 | Fresh / Sweet / Citric                      | 1072         | nf       |                                              |                                                     |                |
| 39     | A12 | Pyrazines / Cocoa                           | 1079         | 1080     | 2,3-Dimethyl-5-ethylpyrazine                 | Pyrazine, 3-ethyl-2,5-dimethyl-                     | 93             |
| 40     | Z26 | Pyrazines / Cocoa                           | 1088         | 1085     | Tetramethylpyrazine                          | Pyrazine, tetramethyl                               | 88             |
| 41     | B13 | Acid / Cheese / Soup                        | 1115         | nf       |                                              |                                                     |                |
| 42     | Z28 | Carbolic soap or jackfruit seeds            | 1137         | 1138     | a methyl-2-methylpropylpyrazine              |                                                     |                |

|    |     |                                  |           |      |                                     |                                            |    |
|----|-----|----------------------------------|-----------|------|-------------------------------------|--------------------------------------------|----|
| 43 | A13 | Carbolic soap or jackfruit seeds | 1137      | 1140 | a methyl-2-methylpropylpyrazine     |                                            |    |
| 44 | A15 | Carbolic soap or jackfruit seeds | 1137      | 1149 | a methyl-2-methylpropylpyrazine     |                                            |    |
| 45 | A14 | Cool / Mint / Sweet              | 1140      | 1132 | Eucalyptol                          |                                            |    |
| 46 | Z27 | Pyrazine / Chocolate / Sweet     | 1150      | nf   |                                     | Pyrazine, 3,5-diethyl-2-methyl             | 86 |
| 47 | B15 | Chocolate / Earth / Roast        | 1159      | 1156 | 2,3-Diethyl-5-methylpyrazine        | Pyrazine, 3,5-diethyl-2-methyl             | 86 |
| 48 | B14 | Cappuccino/ Chocolate            | 1162      | 1171 | 3,5-Diethyl-2-methylpyrazine        | Pyrazine, 3,5-diethyl-2-methyl-            | 84 |
| 49 | A16 | Camphoraceous / Earth            | 1194      | 1182 | 4-Terpineol                         |                                            |    |
| 50 | Z29 | Fresh                            | 1203      | nf   |                                     |                                            |    |
| 51 | Z30 | Green / Pyrazine                 | 1226      | nf   |                                     |                                            |    |
| 52 | Z31 | Sweet / Chocolate                | 1235      | nf   |                                     |                                            |    |
| 53 | Z32 | Pyrazines / Cocoa                | 1245      | 1240 | an Ethyl-2-methylpropylpyrazine     | Pyrazine, 2,5-dimethyl-3-(2-methylpropyl)- | 90 |
| 54 | A17 | Pyrazines / Hot dry / Cocoa      | 1254      | 1258 | a (3-Methylbutyl)-methylpyrazine    | Pyrazine, 2,5-dimethyl-3-(2-methylpropyl)- |    |
| 55 | Z33 | Chocolate                        | 1258      | nf   |                                     | 2-Butyl-3-methylpyrazine                   | 89 |
| 56 | B8  | Jam scum                         | 1262      | 1244 | 2-Phenylethyl ester                 | Acetic acid, 2-phenylethyl ester           | 92 |
| 57 | Z34 | Chocolate                        | 1266      | nf   | 2-Methyl-ethylester-butanoic acid   |                                            |    |
| 58 | Z35 | Sweet / Fresh                    | 1272      | 1276 | (E)-Cinnamaldehyde                  | Cinnamaldehyde                             | 96 |
| 59 | A18 | Sweet / Pyrazine / Earthy        | 1277      | nf   |                                     |                                            |    |
| 60 | B18 | Chocolate / Milk chocolate       | 1288-1293 | nf   |                                     |                                            |    |
| 61 | Z37 | Green / Roast/ Sweet             | 1320      | nf   | an ethyl-3-(2-methylbutyl)pyrazine  | Pyrazine, 2,5-dimethyl-3-(3-methylbutyl)-  | 83 |
| 62 | Z36 | Carbolic soap or jackfruit seeds | 1329      | nf   | an ethyl (3-methylbutyl) pyrazine   | Pyrazine, 2,5-dimethyl-3-(3-methylbutyl)   | 92 |
| 63 | A19 | Pirazine                         | 1325-1338 | nf   |                                     | 1,2,3-Propanetriol, triacetate             | 96 |
| 64 | Z38 | Rose/ Floral/ Sweet/ Fresh       | 1340      | 1347 | Ethyl phenylacetate                 | Phenol, 2-methoxy-4-(2-propenyl)-, acetate | 81 |
| 65 | B19 | Chocolate                        | 1343/1351 | nf   |                                     |                                            |    |
| 66 | Z39 | Rose/ Floral/ Fresh              | 1355      | nf   |                                     |                                            |    |
| 67 | B20 | Chocolate / Pyrazine / Bakery    | 1370      | nf   |                                     |                                            |    |
| 68 | Z40 | Woody                            | 1390      | 1376 | Copaene                             | Copaene                                    | 93 |
| 69 | A20 | Cocoa category                   | 1392      | 1387 | 2,3,5-Trimethyl-6-isopentylpyrazine |                                            |    |
| 70 | Z41 | Chocolate                        | 1399      | nf   |                                     |                                            |    |
| 71 | Z42 | Cedarwood / Fresh / Sweet        | 1413      | 1409 | Cedrene                             |                                            |    |

nf = not found

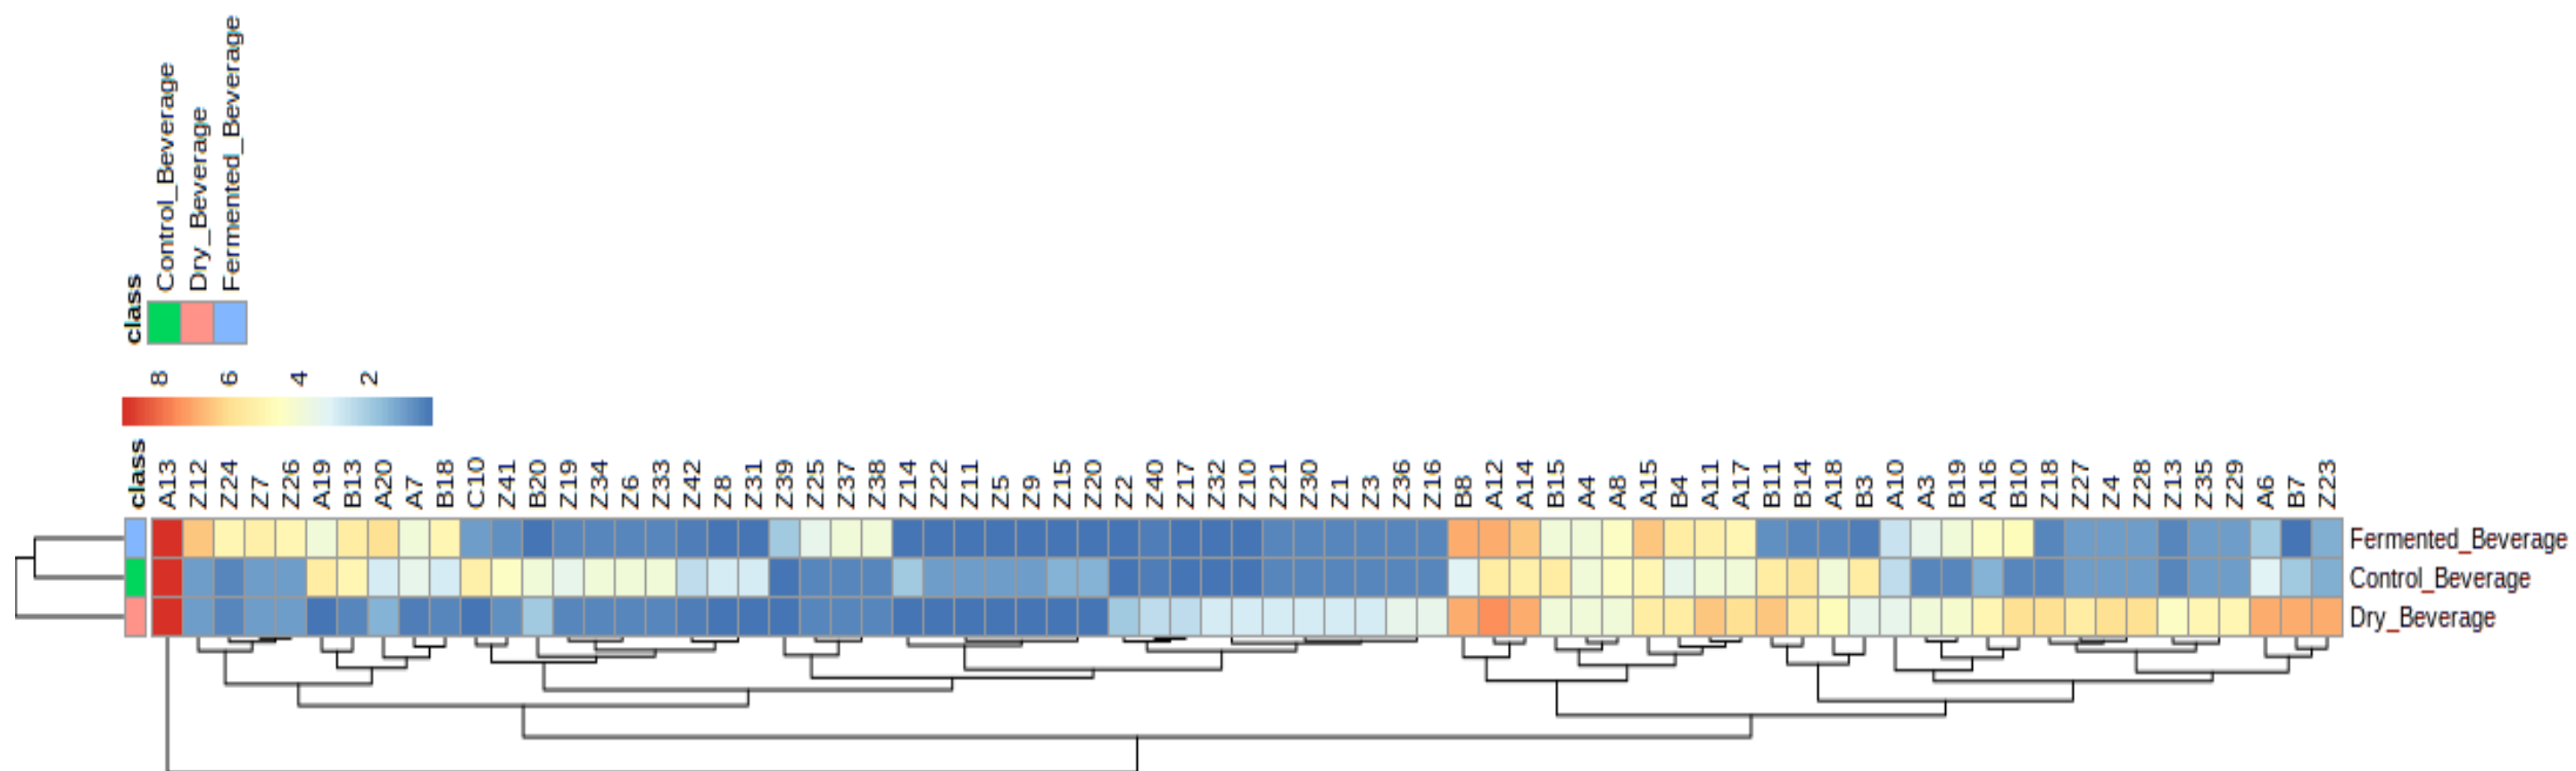

Figure S1\_ Heatmaps for odor-active aroma descriptors in cocoa-beverages replaced with chocolate made from natural jackfruit seed flour.
